# Supplementary material
Source: MDPI journal article supplement (https://www.mdpi.com/2071-1050/14/22/14753)
Supplement: s1 [file s1 › sustainability-1947577-Table S1.xlsx]

## Sheet: Cyclone_Separators
	KEYWORDS PLUS (ID)		AUTHORS KEYWORDS (DE)
S/No	Words	Occurrences	Words	Occurrences
1	performance	136	cyclone separator	95
2	efficiency	99	pressure drop	92
3	cfd	98	cyclone	84
4	pressure-drop	97	separation efficiency	67
5	flow	93	cfd	64
6	simulation	80	collection efficiency	60
7	collection efficiency	72	computational fluid dynamics	57
8	design	63	flow-field	33
9	gas	62	numerical simulation	27
10	numerical-simulation	55	collection	23
11	prediction	55	particle separation	22
12	optimization	46	separation performance	18
13	computational fluid-dynamics	43	cyclone separators	16
14	model	40	vortex finder	16
15	flow pattern	39	gas-solid flow	15
16	inlet	37	separation	15
17	flow-field	33	cyclones	14
18	cyclone	31	computational fluid dynamics (cfd)	13
19	separation	29	flow pattern	12
20	collection	28	multi-objective optimization	12
