# Supplementary material
Source: MDPI journal article supplement (https://www.mdpi.com/2071-1050/14/22/14753)

## Top-Authors' Production over Time

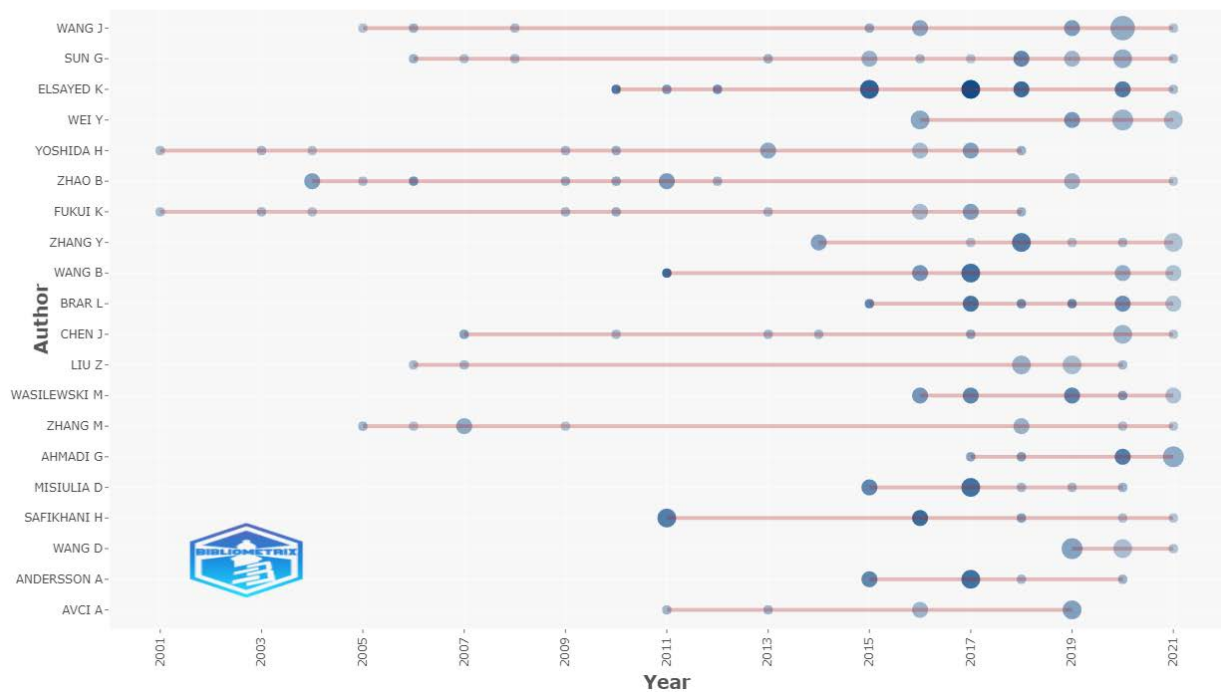

**Figure S1.** Top-Authors' Production over Time.

Supplement: s1 [file s1 › sustainability-1947577-supplementary.pdf]
